# Supplementary material
Source: Springer Nature journal article supplement (https://www.springermedizin.de/resource/supplementary/12885_2008_1759_MOESM4_ESM.pdf/9472866)

A)

## 1. PDGFA

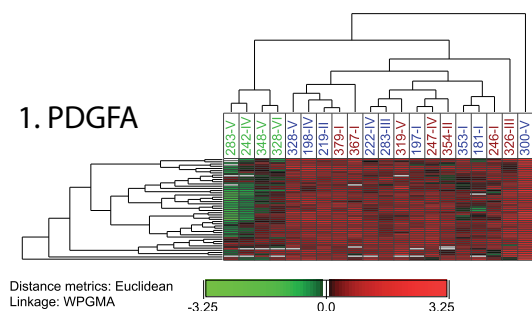

## 2. PDGFB

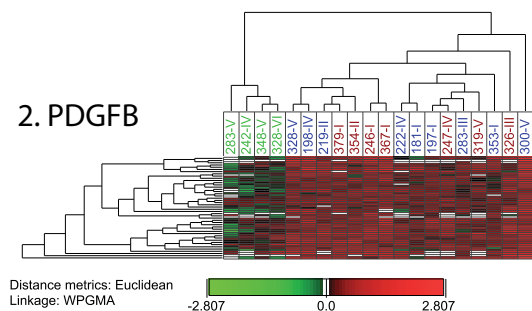

## 3. PDGFC

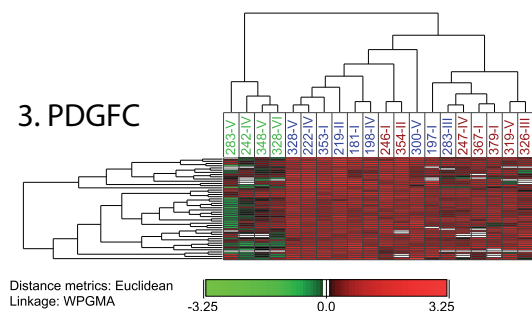

## 4. PDGFD

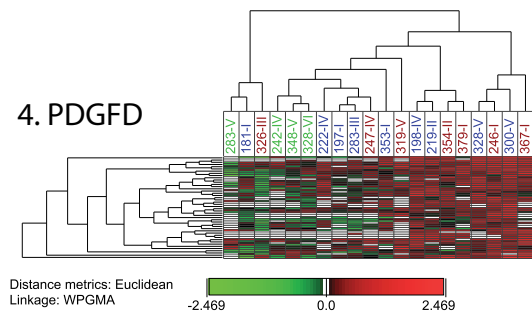

## 5. PDGFRA

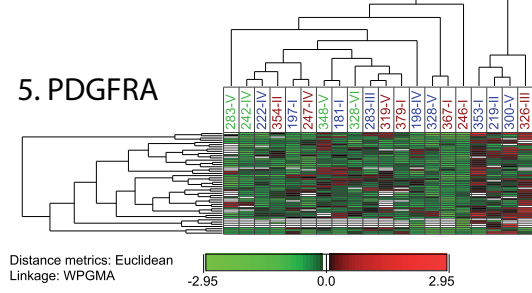

## 6. PDGFRB

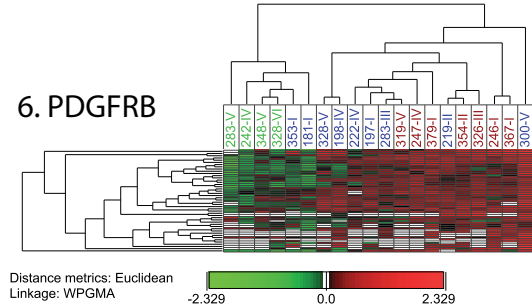

B)

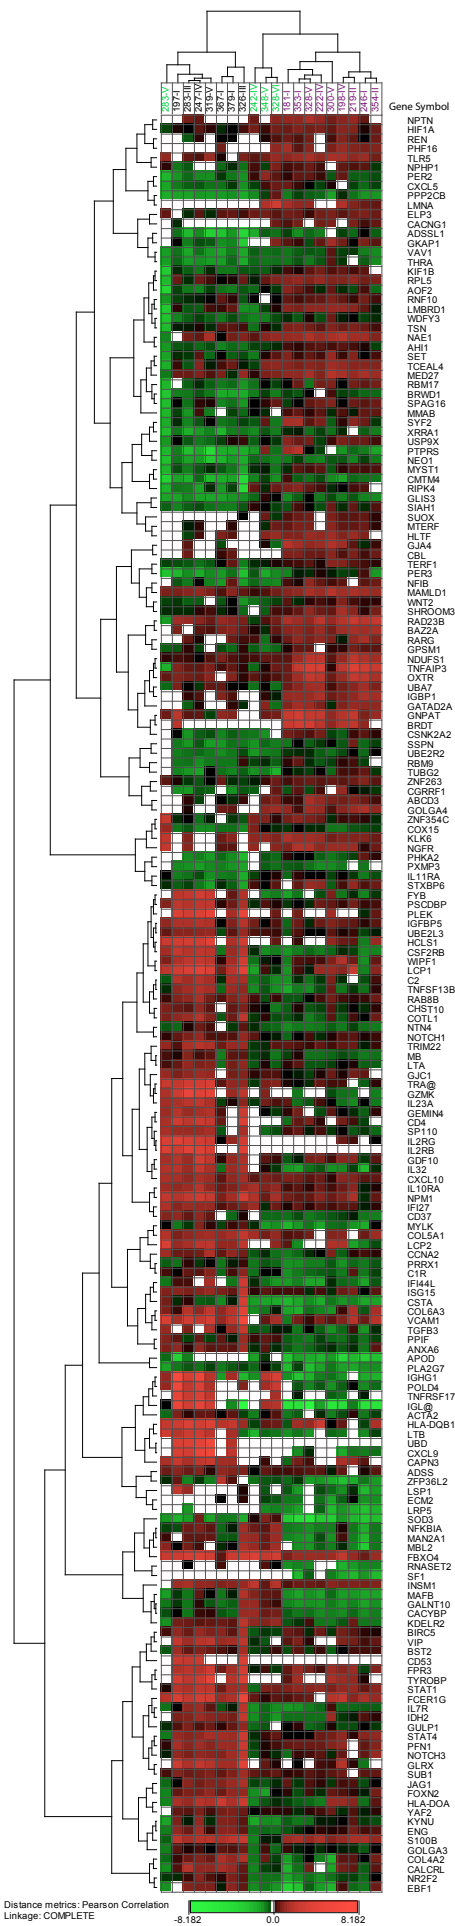

Supplement: MOESM4 [file 9472866]
